# Supplementary material for: Covid-19 Confinement and Changes of Adolescent’s Dietary Trends in Italy, Spain, Chile, Colombia and Brazil
Source: MDPI journal article supplement (doi:10.3390/nu12061807), 2020-06-17
Supplement: s1 [file s1]

**Supplementary Table S1.** National responses to the COVID-19 pandemic.

| COVID-19 pandemic lockdowns |                |            |          |                                                                                                                                                                                                                                                                        |
|-----------------------------|----------------|------------|----------|------------------------------------------------------------------------------------------------------------------------------------------------------------------------------------------------------------------------------------------------------------------------|
| Countries and territories   | Place          | Start date | Level    | Containment measures                                                                                                                                                                                                                                                   |
| Italy                       |                | 08/03/2020 | National | Closed their borders and total quarantine were decreed <sup>1</sup>                                                                                                                                                                                                    |
| Spain                       |                | 14/03/2020 | National | At first, the central government retains all powers and all police are under the control of the Interior Ministry. Many nonessential activities are forbidden, including large gatherings, restaurants, museums. Finally, stay-at-home orders was imposed <sup>2</sup> |
| Brazil                      | Santa Catarina | 17/03/2020 | State    | Closed their borders, prohibition of interstate travel, restriction of items purchased in the markets. Social distancing plan in some states were decreed and schools were closed <sup>3</sup>                                                                         |
|                             | São Paulo      | 24/03/2020 |          |                                                                                                                                                                                                                                                                        |
| Colombia                    |                | 25/03/2020 | National | Closed their borders, and stay-at-home orders were imposed <sup>4</sup>                                                                                                                                                                                                |
| Chile                       | Santiago       | 26/03/2020 | State    | Mandatory quarantine by states and nationwide nightly curfew were decreed. Schools were closed <sup>5</sup>                                                                                                                                                            |
|                             | Independencia  |            |          |                                                                                                                                                                                                                                                                        |
|                             | Providencia    |            |          |                                                                                                                                                                                                                                                                        |
|                             | Ñuñoa          |            |          |                                                                                                                                                                                                                                                                        |
|                             | Las Condes     | 28/03/2020 |          |                                                                                                                                                                                                                                                                        |
|                             | Vitacura       |            |          |                                                                                                                                                                                                                                                                        |
|                             | Lo Barnechea   | 01/04/2020 |          |                                                                                                                                                                                                                                                                        |
| Padre las Casas             |                |            |          |                                                                                                                                                                                                                                                                        |
| Temuco                      |                |            |          |                                                                                                                                                                                                                                                                        |
| Punta Arenas                |                |            |          |                                                                                                                                                                                                                                                                        |

<sup>1</sup>"Il governno firma il decreto coronavirus: l'Italia divisa in 3 zonas". la Repubblica; <sup>2</sup>"Pedro Sánchez anuncia el estado de alarma para frenar el coronavirus 24 horas antes de aprobarlo".

ELMUNDO; <sup>3</sup>"Doria rebate Bolsonaro: 'estamos fazendo o que ele não faz, liderar'". noticias.uol.com.br; <sup>4</sup>"Colombia announces lockdown as coronavirus cases surge". aa.com.tr.; <sup>5</sup>

"Chile announces nationwide nightly curfew, coronavirus cases hit 632". Nationalpost.

**Supplementary Table S2.** Percentage of adolescent participating in this survey classified by countries and regions.

| <b>Country and region</b> | <b>%</b>     |
|---------------------------|--------------|
| <b>Spain</b>              | <b>18.54</b> |
| Madrid                    | 75.00        |
| Andalucía                 | 9.21         |
| Múrcia                    | 5.92         |
| Castilla y León           | 3.29         |
| Islas Baleares            | 1.97         |
| Navarra                   | 1.97         |
| Castilla La Mancha        | 1.32         |
| Cantabria                 | 0.66         |
| Canarias                  | 0.66         |
| <b>Italy</b>              | <b>19.63</b> |
| Vicenza                   | 39.55        |
| Verona                    | 21.47        |
| Rovigo                    | 15.82        |
| Padova                    | 11.86        |
| Lombardía, Mantua         | 3.95         |
| Venezia                   | 3.95         |
| Lombardía, Lodi           | 1.69         |
| Belluno                   | 1.69         |
| <b>Brazil</b>             | <b>14.02</b> |
| Rio de Janiero            | 95.65        |
| São Paulo                 | 3.48         |
| Pernambuco                | 0.87         |
| <b>Colombia</b>           | <b>19.63</b> |
| Bolívar                   | 70.19        |
| Atlántico                 | 8.70         |
| Antioquia                 | 6.21         |
| Bogotá                    | 5.59         |
| Sucre                     | 3.73         |
| Tolima                    | 2.48         |
| Arauco                    | 1.86         |
| Santander                 | 0.62         |
| Córdoba                   | 0.62         |
| <b>Chile</b>              | <b>26.22</b> |
| Concepción                | 63.26        |
| Biobío                    | 20.93        |
| Santiago                  | 8.84         |
| Diguillín                 | 2.79         |
| Arauco                    | 1.40         |
| Llanquihue                | 0.93         |
| Palena                    | 0.47         |
| Antofagasta               | 0.47         |
| Arica                     | 0.47         |
| Punilla                   | 0.47         |

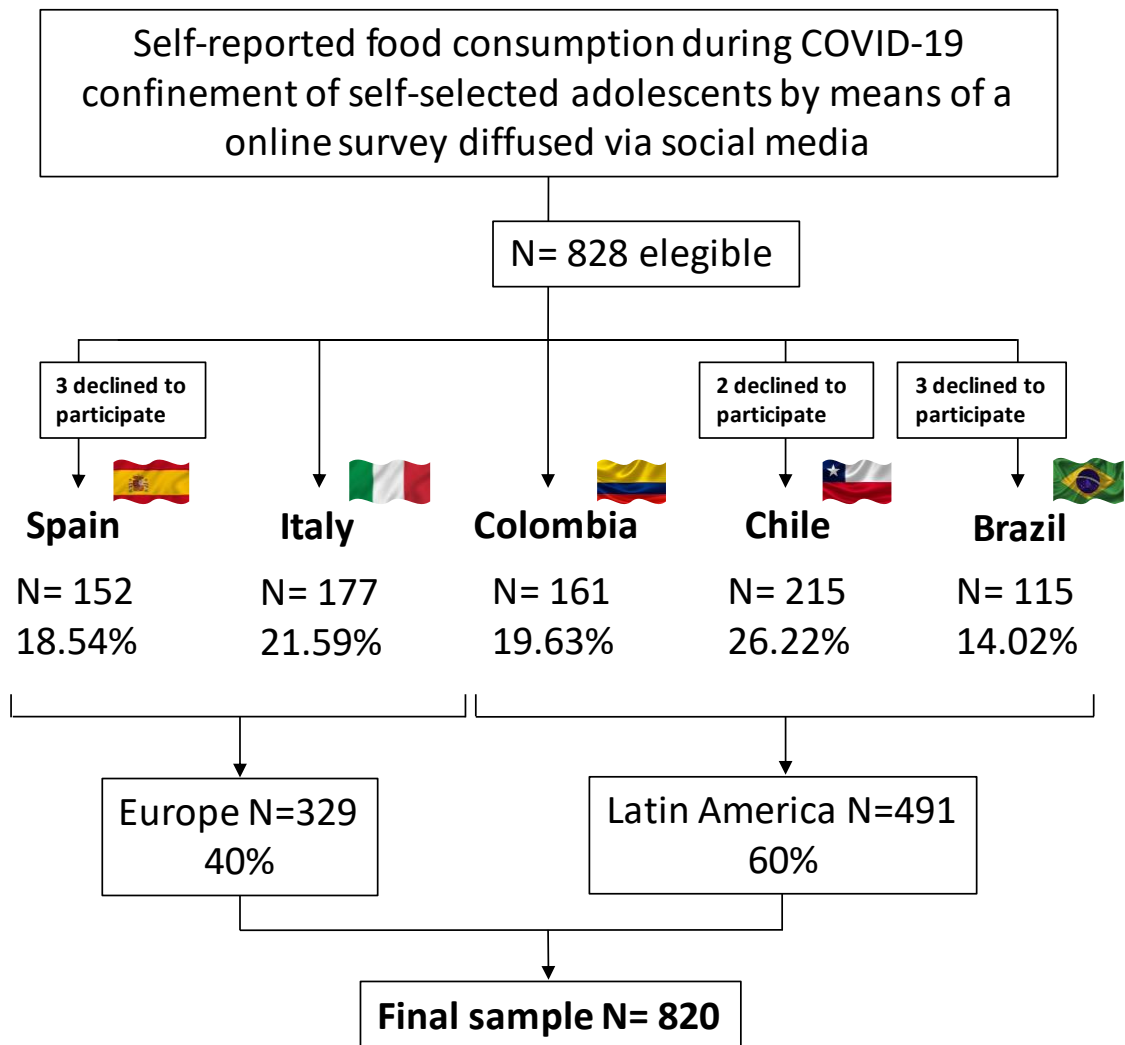

**Supplementary Figure S1.** Flow chart of participants of the study.
